# Supplementary material
Source: PubMed Central journal article supplement (PMC2626741)
Supplement: 0802550106_0802550106SI.pdf [file 0802550106_0802550106SI.pdf]

# Supporting Information

Thal et al. 10.1073/pnas.0802550106

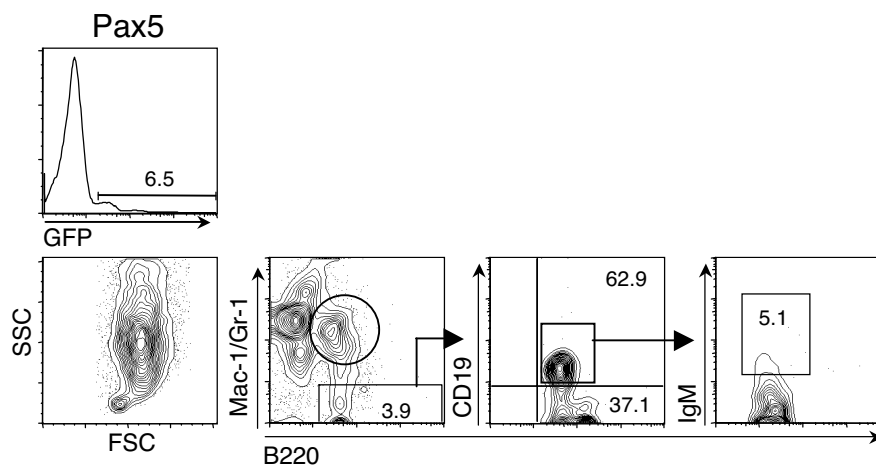

**Fig. S1.** Representative flow cytometric analysis of bone marrow from mice reconstituted with Pax5-expressing cells at 6 weeks PT ( $n = 11$ ). Plots were first gated on GFP+ cells. IgM expression was analyzed on pro-B/pre-B cells. Numbers indicate percentages of total GFP+ cells. Circle indicates aberrant B220+Mac-1+Gr-1+ subset among GFP+ cells.

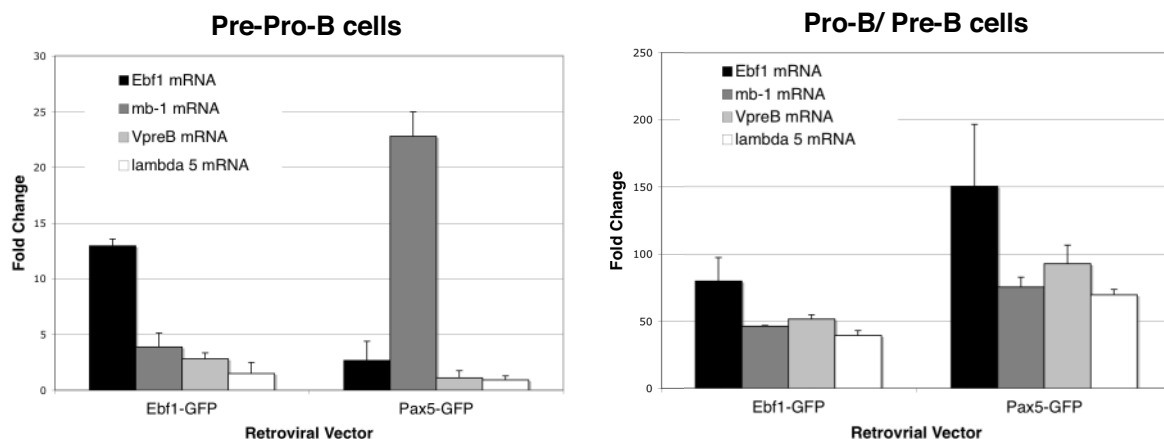

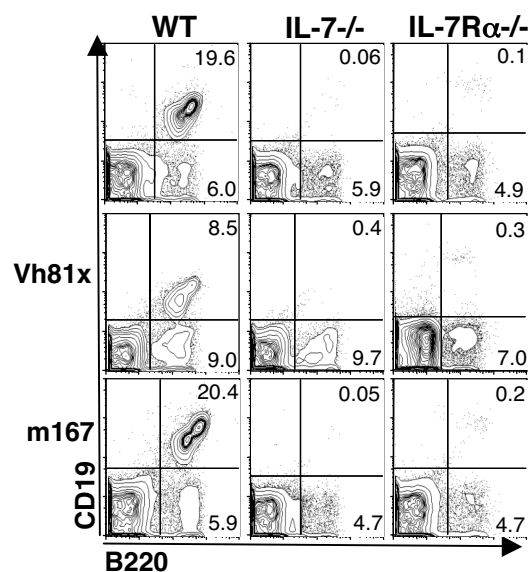

**Fig. S3.** IgH transgene (Vh81x or m167) expression does not rescue B cell development in IL-7- or IL-7Rα-deficient mice. Numbers indicate percentages of subsets within whole bone marrow. Data are representative of at least 5 mice per genotype.

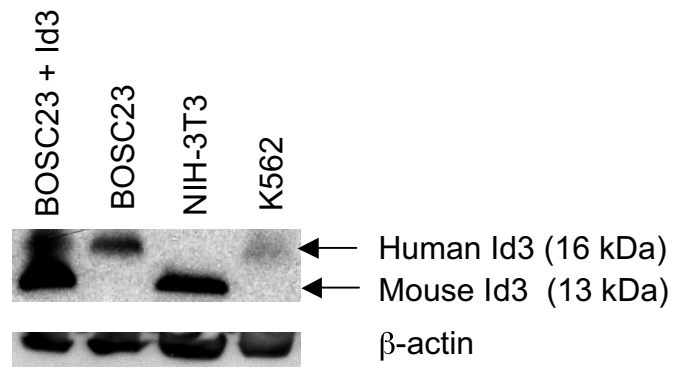

**Fig. S4.** Western blot analysis showing Id3 expression in BOSC23, NIH 3T3, and K562 cells. As a positive control, BOSC23 cells were transfected with the mouse Id3 retroviral construct. A 15% SDS/PAGE gel was used to separate the human and mouse Id3 bands.
